# Supplementary material
Source: PubMed Central journal article supplement (PMC4460453)
Supplement: pnas.201408355SI.pdf [file pnas.201408355SI.pdf]

# Supporting Information

Kundakovic et al. 10.1073/pnas.1408355111

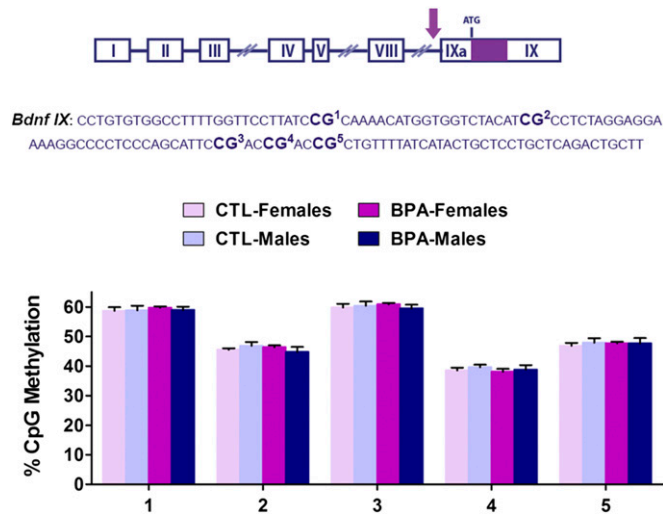

Fig. S1. CpG methylation of *Bdnf* IX in the P28 hippocampus after prenatal BPA exposure. Schematic representation of the *Bdnf* gene and the sequence of *Bdnf* promoter IX including five CpG sites that were examined using the bisulfite pyrosequencing method.

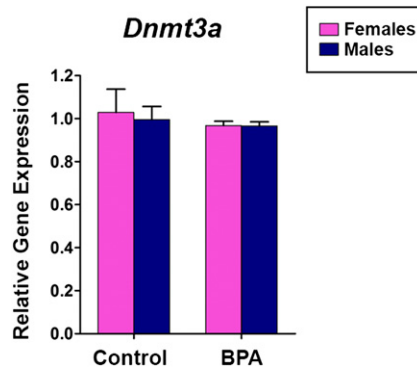

Fig. S2. Gene expression analysis of *Dnmt3a* in the P60 hippocampus of males and females prenatally exposed to BPA (200  $\mu$ g/kg per day) or vehicle (CTL).
